# Supplementary material for: Visualizing in-field detection of HCV using a one-pot RT-RAA-CRISPR/Cas12a platform
Source: Royal Society of Chemistry journal article supplement (doi:10.1039/d4ay01253d), 2024-01-01
Supplement: d4ay01253d1.pdf [file d4ay01253d1.pdf]

## Supplementary data

**Table S1** Sequence information for targets, RAA primers and Cas12a-crRNA.

| Name         |         | Sequence (5'--> 3')                                                    |
|--------------|---------|------------------------------------------------------------------------|
| Targets      | T1      | TTTCTTGGATT/C/AAACCCGCTCAATG                                           |
|              | T2      | TTGGGCGTGCCCCGCAAGACTG                                                 |
| RAA-primers  | F1      | TCCCGGGAGAGCCATAGTGGTCTGCGGAAC                                         |
|              | R1      | GTACTGCCTGATAGGGTGCTTGCGAGTGCC                                         |
|              | F2      | GGGAGAGCCATAGTGGTCTGCGGAACCGGT                                         |
|              | R2      | GCTTGCGAGTGCCCCGGGAGGTCTCGTAGA                                         |
|              | F3      | TCACTCCCCTGTGAGGAACTACTGTCTTCA                                         |
|              | R3      | CCCCGCAAGACTGCTAGCCGAGTAGTGTT                                          |
| Cas12a-crRNA | crRNA 1 | UAAUACGACUCACUAUAGGGUAAUUUCUACUAAGUGU<br>AGA UUUGGAUU/C/AAACCCGCUCAAUG |
|              | crRNA 2 | UAAUACGACUCACUAUAGGGUAAUUUCUACUAAGUGU<br>AGAUGGCGUGCCCCGCAAGACUG       |
